# Supplementary material for: Characteristic analysis of early gastric cancer after Helicobacter pylori eradication: a multicenter retrospective propensity score-matched study
Source: PubMed Central journal article supplement — Ann Med. 2023 Jul 14;55(1):2231852. doi: 10.1080/07853890.2023.2231852 (PMC10351464; doi:10.1080/07853890.2023.2231852), 2023-07-14
Supplement: IANN_A_2231852_SM5426.pdf [file IANN_A_2231852_SM5426.pdf]

**Supplementary Table 1.** Analysis of the reasons of long-term use of PPI and the combined use of anti-platelet agents between *Hp*-eradicated and control groups before and after propensity-score matching.

|                       | All patients            |                   | <i>P</i> value | Propensity score-matched patients |                   | <i>P</i> value |
|-----------------------|-------------------------|-------------------|----------------|-----------------------------------|-------------------|----------------|
|                       | Hp-eradicated group (%) | Control group (%) |                | Hp-eradicated group (%)           | Control group (%) |                |
| Reasons of taking PPI |                         |                   | 0.043          |                                   |                   | 0.118          |
| GERD                  | 25 (42.4)               | 4 (18.2)          |                | 7 (41.2)                          | 2 (11.8)          |                |
| Others                | 34 (57.6)               | 18 (81.8)         |                | 10 (58.8)                         | 15 (88.2)         |                |
| Anti-platelet agents  |                         |                   | 0.539          |                                   |                   | 1.000          |
| Yes                   | 5 (6.2)                 | 9 (8.6)           |                | 5 (8.1)                           | 4 (6.5)           |                |
| No                    | 76 (93.8)               | 96 (91.4)         |                | 57 (91.9)                         | 58 (93.5)         |                |

PPI, proton pump inhibitor; GERD, gastroesophageal reflux disease.

**Supplementary Table 2.** Analysis of immunohistochemical indicators between *Hp*-eradicated and control groups before and after propensity-score matching.

| Indicator | All patients            |                   |                | Propensity score-matched patients |                   |                |
|-----------|-------------------------|-------------------|----------------|-----------------------------------|-------------------|----------------|
|           | Hp-eradicated group (%) | Control group (%) | <i>P</i> value | Hp-eradicated group (%)           | Control group (%) | <i>P</i> value |
| CKpan     |                         |                   | 1.000          |                                   |                   | 1.000          |
| +         | 50 (98.0)               | 82 (98.8)         |                | 38 (100.0)                        | 45 (97.8)         |                |
| -         | 1 (2.0)                 | 1 (1.2)           |                | 0 (0.0)                           | 1 (2.2)           |                |
| HER2      |                         |                   | 0.650          |                                   |                   | 0.183          |
| +         | 18 (30.5)               | 34 (34.0)         |                | 12 (27.9)                         | 24 (40.7)         |                |
| -         | 41 (69.5)               | 66 (66.0)         |                | 31 (72.1)                         | 35 (59.3)         |                |
| Syn       |                         |                   | 0.436          |                                   |                   | 0.077          |
| +         | 13 (36.1)               | 15 (28.3)         |                | 10 (37.0)                         | 5 (15.6)          |                |
| -         | 23 (63.9)               | 38 (71.7)         |                | 17 (63.0)                         | 27 (84.4)         |                |
| CgA       |                         |                   | 0.190          |                                   |                   | 0.033          |
| +         | 19 (55.9)               | 22 (41.5)         |                | 15 (57.7)                         | 9 (28.1)          |                |
| -         | 15 (44.1)               | 31 (58.5)         |                | 11 (42.3)                         | 23 (71.9)         |                |
| SMA       |                         |                   | 0.888          |                                   |                   | 0.300          |
| +         | 14 (34.1)               | 22 (32.8)         |                | 13 (41.9)                         | 14 (30.4)         |                |
| -         | 27 (65.9)               | 45 (67.2)         |                | 18 (58.1)                         | 32 (69.6)         |                |
| S100      |                         |                   | 1.000          |                                   |                   | 1.000          |
| +         | 1 (1.7)                 | 3 (3.2)           |                | 1 (2.4)                           | 2 (3.7)           |                |
| -         | 57 (98.3)               | 90 (96.8)         |                | 41 (97.6)                         | 52 (96.3)         |                |
| CD31      |                         |                   | 0.372          |                                   |                   | 0.578          |
| +         | 3 (5.1)                 | 2 (2.1)           |                | 2 (4.7)                           | 1 (1.8)           |                |
| -         | 56 (94.9)               | 93 (97.9)         |                | 41 (95.3)                         | 55 (98.2)         |                |
| D2-40     |                         |                   | 0.559          |                                   |                   | 0.441          |
| +         | 2 (3.5)                 | 1 (1.1)           |                | 1 (2.4)                           | 0 (0.0)           |                |
| -         | 55 (96.5)               | 90 (98.9)         |                | 40 (97.6)                         | 52 (100.0)        |                |
| P53       |                         |                   | 1.000          |                                   |                   | 0.633          |
| +         | 18 (90.0)               | 24 (85.7)         |                | 14 (93.3)                         | 19 (86.4)         |                |
| -         | 2 (10.0)                | 4 (14.3)          |                | 1 (6.7)                           | 3 (13.6)          |                |
| MUC2      |                         |                   | 0.343          |                                   |                   | 0.305          |
| +         | 3 (42.9)                | 11 (73.3)         |                | (98.8)                            | 10 (71.4)         |                |
| -         | 4 (57.1)                | 4 (26.7)          |                | (98.8)                            | 4 (28.6)          |                |
| MUC5AC    |                         |                   | 0.129          |                                   |                   | 0.115          |
| +         | 4 (50.0)                | 14 (87.5)         |                | 3 (50.0)                          | 13 (86.7)         |                |
| -         | 4 (50.0)                | 2 (12.5)          |                | 3 (50.0)                          | 2 (13.3)          |                |
| MUC6      |                         |                   | 0.077          |                                   |                   | 0.155          |
| +         | 4 (57.1)                | 14 (93.3)         |                | 3 (60.0)                          | 13 (92.9)         |                |
| -         | 3 (42.9)                | 1 (6.7)           |                | 2 (40.0)                          | 1 (7.1)           |                |
| CEA       |                         |                   | 1.000          |                                   |                   | 1.000          |
| +         | 3 (75.0)                | 9 (81.8)          |                | 3 (75.0)                          | 7 (77.8)          |                |
| -         | 1 (25.0)                | 2 (18.2)          |                | 1 (25.0)                          | 2 (22.2)          |                |

**Supplementary Table 3.** Subgroup analysis of characteristics excluding HGIN between *Hp*-eradicated and control groups before and after propensity-score matching.

| Characteristics          | All patients (n=99)                     |                           | <i>P</i> value | Propensity score-matched patients (n = 48) |                           | <i>P</i> value |
|--------------------------|-----------------------------------------|---------------------------|----------------|--------------------------------------------|---------------------------|----------------|
|                          | <i>Hp</i> -eradicated group<br>n=30 (%) | Control group<br>n=69 (%) |                | <i>Hp</i> -eradicated group<br>n=24 (%)    | Control group<br>n=24 (%) |                |
| Sex                      |                                         |                           | 0.262          |                                            |                           | 1.000          |
| Male                     | 26 (86.7)                               | 53 (76.8)                 |                | 20 (83.3)                                  | 21 (87.5)                 |                |
| Female                   | 4 (13.3)                                | 16 (23.2)                 |                | 4 (16.7)                                   | 3 (12.5)                  |                |
| Age, yr                  | 60.53±9.48                              | 61.45±9.12                | 0.651          | 60.54±9.28                                 | 59.04±10.59               | 0.604          |
| CCI                      | 0.70±0.92                               | 0.78±1.06                 | 0.711          | 0.63±0.88                                  | 0.42±0.78                 | 0.387          |
| Time of taking PPI       |                                         |                           | <0.001         |                                            |                           | 0.043          |
| ≤ 1 year                 | 9 (30.0)                                | 51 (73.9)                 |                | 8 (33.3)                                   | 15 (62.5)                 |                |
| > 1 year                 | 21 (70.0)                               | 18 (26.1)                 |                | 16 (66.7)                                  | 9 (37.5)                  |                |
| Mucosal atrophy          |                                         |                           | 0.010          |                                            |                           | 0.009          |
| Mild                     | 9 (30.0)                                | 43 (62.3)                 |                | 8 (33.3)                                   | 18 (75.0)                 |                |
| Moderate                 | 18 (60.0)                               | 22 (31.9)                 |                | 14 (58.3)                                  | 5 (20.8)                  |                |
| Severe                   | 3 (10.0)                                | 4 (5.8)                   |                | 2 (8.3)                                    | 1 (4.2)                   |                |
| Mucosal map-like redness |                                         |                           | <0.001         |                                            |                           | <0.001         |
| Yes                      | 26 (86.7)                               | 10 (14.5)                 |                | 20 (83.3)                                  | 5 (20.8)                  |                |
| No                       | 4 (13.3)                                | 59 (85.5)                 |                | 4 (16.7)                                   | 19 (79.2)                 |                |
| Lesion size (mm)         | 15.00, 11.5                             | 20.00, 13                 | 0.069          | 12.00, 10                                  | 15.00, 8                  | 0.299          |
| Lesion range             |                                         |                           | 0.259          |                                            |                           | 1.000          |
| ≤ 20mm                   | 23 (76.7)                               | 45 (65.2)                 |                | 19 (79.2)                                  | 19 (79.2)                 |                |
| > 20mm                   | 7 (23.3)                                | 24 (34.8)                 |                | 5 (20.8)                                   | 5 (20.8)                  |                |
| Lesion location          |                                         |                           | 0.676          |                                            |                           | 1.000          |
| Upper                    | 5 (16.7)                                | 11 (15.9)                 |                | 3 (12.5)                                   | 2 (8.3)                   |                |
| Middle                   | 5 (16.7)                                | 17 (24.6)                 |                | 5 (20.8)                                   | 6 (25.0)                  |                |
| Lower                    | 20 (66.6)                               | 41 (59.5)                 |                | 16 (66.7)                                  | 16 (66.7)                 |                |
| Lesion border            |                                         |                           | 0.448          |                                            |                           | 0.666          |
| Clear                    | 26 (86.7)                               | 64 (92.8)                 |                | 20 (83.3)                                  | 22 (91.7)                 |                |
| Unclear                  | 4 (13.3)                                | 5 (7.2)                   |                | 4 (16.7)                                   | 2 (8.3)                   |                |
| Inflammation             |                                         |                           | 0.582          |                                            |                           | 1.000          |
| Mild                     | 2 (6.7)                                 | 2 (6.7)                   |                | 2 (8.3)                                    | 1 (4.2)                   |                |
| Moderate                 | 28 (93.3)                               | 67 (97.1)                 |                | 22 (91.7)                                  | 23 (95.8)                 |                |
| Activity                 |                                         |                           | 0.080          |                                            |                           | 0.247          |
| Mild                     | 17 (56.7)                               | 26 (37.7)                 |                | 13 (54.2)                                  | 9 (37.5)                  |                |
| Moderate                 | 13 (43.3)                               | 43 (62.3)                 |                | 11 (45.8)                                  | 15 (62.5)                 |                |
| Intestinal metaplasia    |                                         |                           | 0.069          |                                            |                           | 0.088          |
| None                     | 0 (0.0)                                 | 7 (10.1)                  |                | 0 (0.0)                                    | 3 (12.5)                  |                |
| Mild                     | 6 (20.0)                                | 22 (31.9)                 |                | 5 (20.8)                                   | 6 (25.0)                  |                |

|                   |           |           |       |           |           |       |
|-------------------|-----------|-----------|-------|-----------|-----------|-------|
| Moderate          | 24 (80.0) | 38 (55.1) |       | 19 (79.2) | 13 (54.2) |       |
| Severe            | 0 (0.0)   | 2 (2.9)   |       | 0 (0.0)   | 2 (8.3)   |       |
| Type <sup>†</sup> |           |           | 0.182 |           |           | 0.051 |
| WDA               | 13 (43.4) | 24 (34.8) |       | 12 (50.0) | 10 (41.6) |       |
| MDA               | 15 (50.0) | 28 (40.6) |       | 4 (16.7)  | 12 (50.0) |       |
| PDA               | 1 (3.3)   | 13 (18.8) |       | 4 (16.7)  | 1 (4.2)   |       |
| SRCC              | 1 (3.3)   | 4 (5.8)   |       | 4 (16.7)  | 1 (4.2)   |       |
| Differentiation   |           |           | 0.05  |           |           | 0.137 |
| Well              | 28 (93.3) | 53 (76.8) |       | 22 (91.7) | 17 (70.8) |       |
| Poor              | 2 (6.7)   | 16 (23.2) |       | 2 (8.3)   | 7 (29.2)  |       |
| Ki-67 index       |           |           | 0.197 |           |           | 0.429 |
| <50%              | 19 (28.4) | 11 (42.3) |       | 9 (45.0)  | 8 (33.3)  |       |
| ≥50%              | 48 (71.6) | 15 (57.7) |       | 11 (55.0) | 16 (66.7) |       |

<sup>†</sup>HGIN, high-grade intraepithelial neoplasia; WDA, well-differentiated adenocarcinoma; MDA, moderately differentiated adenocarcinoma; PDA, poorly differentiated adenocarcinoma; SRCC, signet ring cell carcinoma.

**Supplementary Table 4.** Analysis of PPI usage time in different gastric mucosal backgrounds in *Hp*-eradicated group.

| Time of taking PPI    | ≤1 year (%) | >1 year (%) | <i>P</i> value |
|-----------------------|-------------|-------------|----------------|
| Mucosal atrophy       |             |             | 0.882          |
| Mild                  | 8 (36.4)    | 24 (40.7)   |                |
| Moderate              | 11 (50.0)   | 29 (49.1)   |                |
| Severe                | 3 (13.6)    | 6 (10.2)    |                |
| Inflammation          |             |             | 1.000          |
| Mild                  | 1 (4.5)     | 4 (6.8)     |                |
| Moderate              | 21 (95.5)   | 55 (93.2)   |                |
| Activity              |             |             | 0.417          |
| Mild                  | 12 (54.5)   | 38 (64.4)   |                |
| Moderate              | 10 (45.5)   | 21 (35.6)   |                |
| Intestinal metaplasia |             |             | 0.237          |
| None                  | 1 (4.6)     | 2 (3.4)     |                |
| Mild                  | 3 (13.6)    | 19 (32.2)   |                |
| Moderate              | 18 (81.8)   | 36 (61.0)   |                |
| Severe                | 0 (0.0)     | 2 (3.4)     |                |
